# Supplementary material for: Risk estimation before progression to mild cognitive impairment and Alzheimer’s disease: an AD resemblance atrophy index
Source: publisher site journal article supplement (doi:10.18632/aging.102184), 2019-08-29
Supplement: Supplementary file [file aging-v11i16-102184-supplementary-material-SD1.pdf]

## SUPPLEMENTARY TABLES

**Supplementary Table 1. Available number of subjects for biomarkers of CSF and F18-AV-45 PET.**

|                                    | NCs | NCc | MCIs | MCIc | AD | Total |
|------------------------------------|-----|-----|------|------|----|-------|
| Included subjects <sup>^</sup> , n | 50  | 23  | 50   | 35   | 25 | 183   |
| CSF A $\beta$ <sub>42</sub> , n    |     |     |      |      |    |       |
| Baseline                           | 44  | 12  | 48   | 35   | 25 | 164   |
| 24 months                          | 27  | 6   | 31   | 20   | 12 | 96    |
| CSF t-tau, n                       |     |     |      |      |    |       |
| Baseline                           | 44  | 12  | 48   | 34   | 23 | 161   |
| 24 months                          | 27  | 6   | 31   | 19   | 12 | 95    |
| CSF p-tau <sub>181</sub> , n       |     |     |      |      |    |       |
| Baseline                           | 44  | 12  | 48   | 35   | 25 | 164   |
| 24 months                          | 27  | 6   | 31   | 20   | 12 | 96    |
| Mean cortical SUVR*, n             |     |     |      |      |    |       |
| Baseline                           | 50  | 23  | 50   | 35   | 25 | 183   |
| 24 months                          | 48  | 18  | 42   | 34   | 22 | 164   |

<sup>^</sup>Total number of the subjects included in this study. \*Mean average cortical uptake (within frontal, anterior/posterior cingulate, lateral parietal, and lateral temporal cortex) of Florbetapir (F18-AV-45) PET with the whole cerebellum as the reference region. NCs, NC stable subjects; NCc, NC-to-MCI converters; MCIs, MCI stable subjects; MCIc, MCI-to-AD converters; ADs, AD stable subjects; CSF, cerebrospinal fluid; SUVR, standard uptake value ratio.

**Supplementary Table 2. MoCA and its subscores at baseline and 24 months.**

|                              | NCs (n=50)   | NCc (n=23)   | MCIs (n=50)  | MCIc (n=35)  | ADs (n=25)   | <i>p</i> |
|------------------------------|--------------|--------------|--------------|--------------|--------------|----------|
| MoCA, mean (SD)              |              |              |              |              |              |          |
| Baseline                     | 25.98 (1.76) | 25.13 (2.10) | 24.62 (2.39) | 23.49 (2.72) | 19.52 (5.10) | <0.001   |
| 24 months                    | 26.46 (1.61) | 25.55 (1.87) | 25.02 (2.56) | 19.86 (4.10) | 14.21 (6.20) | <0.001   |
| MoCA-memory, mean (SD)       |              |              |              |              |              |          |
| Baseline                     | 9.58 (1.03)  | 9.52 (1.08)  | 9.44 (1.25)  | 9.20 (1.35)  | 7.32 (2.76)  | <0.001   |
| 24 months                    | 9.64 (0.72)  | 9.55 (0.74)  | 9.66 (1.30)  | 6.97 (2.05)  | 5.00 (2.75)  | <0.001   |
| MoCA-visuospatial, mean (SD) |              |              |              |              |              |          |
| Baseline                     | 3.42 (0.73)  | 3.00 (0.90)  | 3.26 (0.83)  | 2.94 (0.97)  | 2.44 (1.12)  | <0.001   |
| 24 months                    | 3.62 (0.60)  | 3.14 (0.94)  | 3.10 (0.86)  | 2.57 (1.07)  | 1.79 (0.98)  | <0.001   |
| MoCA-language, mean (SD)     |              |              |              |              |              |          |
| Baseline                     | 4.58 (0.61)  | 4.61 (0.66)  | 4.30 (0.76)  | 4.17 (1.07)  | 3.92 (1.08)  | 0.007    |
| 24 months                    | 4.76 (0.52)  | 4.59 (0.59)  | 4.38 (0.81)  | 3.60 (1.24)  | 2.96 (1.46)  | <0.001   |
| MoCA-attention, mean (SD)    |              |              |              |              |              |          |
| Baseline                     | 3.86 (0.45)  | 3.70 (0.56)  | 3.64 (0.56)  | 3.34 (0.80)  | 2.64 (1.35)  | <0.001   |
| 24 months                    | 3.92 (0.34)  | 3.82 (0.39)  | 3.62 (0.67)  | 3.03 (0.98)  | 1.96 (1.52)  | <0.001   |
| MoCA-executive, mean (SD)    |              |              |              |              |              |          |
| Baseline                     | 4.54 (0.65)  | 4.30 (0.88)  | 3.98 (1.00)  | 3.83 (1.15)  | 3.20 (1.32)  | <0.001   |
| 24 months                    | 4.52 (0.95)  | 4.45 (0.80)  | 4.26 (0.90)  | 3.69 (1.21)  | 2.50 (1.44)  | <0.001   |

NCs, NC stable subjects; NCc, NC-to-MCI converters; MCIs, MCI stable subjects; MCIc, MCI-to-AD converters; ADs, AD stable subjects.
